# Supplementary material for: Measuring Research Impact Through Citation Patterns: A Decade of Bariatric Surgery Literature
Source: Research Square preprint supplement (doi:10.21203/rs.3.rs-8523910/v1), 2026-01-30
Supplement: Supplementary file 1 [file 4f569f941ccf9346fb98ddb0.docx]

Table I: Comparison of disruptive and consolidating bariatric surgery articles 2010-2020 including publication date, author count, citation count and reference count

| **Variable** | ***p-*value** | **Positive DI mean** | **Positive DI std** | **Negative DI mean** | **Negative DI std** |
| --- | --- | --- | --- | --- | --- |
| DI | – | 0.002 | 0.011 | -0.002 | 0.004 |
| DI* | – | 0.003 | 0.013 | 0.001 | 0.003 |
| DI# | – | 0.001 | 0.003 | 0.002 | 0.006 |
| Years since publication | <0.0001 | 8.8 | 3.02 | 8.4 | 3.03 |
| Reference count | <0.0001 | 47.4 | 57.4 | 50.5 | 50.5 |
| Citation count | <0.0001 | 64.0 | 258.4 | 45.8 | 66.4 |
| Number of authors | <0.0001 | 5.3 | 3.8 | 6.2 | 4.7 |

Table II: Comparison of disruptive vs consolidating bariatric surgery articles from 2010-2020 in terms of article type

| **Article Type** | ***p-*value** | **Positive DI count** | **Positive DI proportion** | **Negative DI count** | **Negative DI proportion** | **Odds Ratio** |
| --- | --- | --- | --- | --- | --- | --- |
| Reviews | <0.0001 | 2133 | 0.49 | 6593 | 0.43 | 1.27 |
| Primary study | <0.0001 | 457 | 0.10 | 2106 | 0.14 | 0.74 |
| Clinical trial | <0.0001 | 74 | 0.017 | 398 | 0.03 | 0.65 |
| Case report | 0.01 | 237 | 0.054 | 694 | 0.04 | 1.21 |
| Meta analysis | 0.06 | 92 | 0.021 | 401 | 0.03 | 0.80 |
| Comments | 0.09 | 14 | 0.003 | 28 | 0.00 | 1.76 |

Table III: Top 10 Most Cited Bariatric Surgery Articles (2010-2020)

| **Article Title** | **DI** | **Year** | **Reference Count** | **Citation Count** | **Publication Types** | **Authors** |
| --- | --- | --- | --- | --- | --- | --- |
| Clinical Practice Guidelines for the Perioperative Nutritional, Metabolic, and Nonsurgical Support of the Bariatric Surgery Patient—2013 Update: Cosponsored by American Association of Clinical Endocrinologists, The Obesity Society, and American Society for Metabolic & Bariatric Surgery | 0.03 | 2013 | 412 | 2090 | Journal Article | Mechanick J.I., Youdim A., Jones D.B., et al. |
| Review of the key results from the Swedish Obese Subjects (SOS) trial - a prospective controlled intervention study of bariatric surgery | 0.03 | 2013 | 109 | 1587 | Review, Journal Article | Sjöström L. |
| Metabolic/bariatric surgery worldwide 2011 | 0.30 | 2013 | 7 | 1575 | Journal Article, Review | Buchwald H., Oien D.M. |
| Bariatric Surgery versus Intensive Medical Therapy for Diabetes — 3-Year Outcomes | 0.09 | 2014 | 24 | 1547 | Journal Article, Study | Schayer P.R., Bhatt D.L., Kirwan J.P., et al. |
| The Effectiveness and Risks of Bariatric Surgery An Updated Systematic Review and Meta-analysis, 2003-2012 | 0.03 | 2014 | 71 | 1449 | Review, Metanalysis, Journal Article | Chang S., Stoll C.R.T, Song J., et al. |
| Bariatric Surgery and Long-term Cardiovascular Events | 0.07 | 2012 | 40 | 1446 | Journal Article | Sjöström L., Peltonen M,, Jacobson P., et al. |
| Surgery for weight loss in adults | 0.05 | 2014 | 127 | 1337 | Review, Metanalysis, Journal Article | Colquitt J.L., Pickett K., Loveman, E., et al. |
| Bariatric Surgery Worldwide 2013 | 0.24 | 2015 | 11 | 1251 | Journal Article, Review | Angrisani L., Santonicola A., Iovino, P., et al. |
| Surgical Skill and Complication Rates after Bariatric Surgery | 0.20 | 2013 | 30 | 1179 | Journal Article | Birkmeyer J.D., Finks J. F., O’Reilly, A., et al. |
| Mechanisms, Pathophysiology, and Management of Obesity | 0.04 | 2017 | 81 | 1165 | [Review, Journal Article] | Heysmfield S.B., Wadden T. A. |

Table IV: Top 10 Most Disruptive Bariatric Surgery Articles (2010-2020)

| **Title** | **DI** | **Year** | **Reference Count** | **Citation Count** | **Publication Types** | **Authors** |
| --- | --- | --- | --- | --- | --- | --- |
| Metabolic/bariatric surgery worldwide 2011 | 0.30 | 2013 | 7 | 1575 | Journal Article, Review | Buchwald H., Oien D.M. |
| American Society for Metabolic and Bariatric Surgery estimation of metabolic and bariatric procedures performed in the United States in 2016 | 0.25 | 2018 | 6 | 424 | Journal Article, Review | English W.J., DeMaria E.J, Brethauer S.A., et al. |
| Bariatric Surgery Worldwide 2013 | 0.24 | 2015 | 11 | 1251 | Journal Article, Review | Angrisani L., Santonicola A., Iovino, P., et al. |
| Surgical Skill and Complication Rates after Bariatric Surgery | 0.20 | 2013 | 30 | 1179 | Journal Article | Birkmeyer J.D., Finks J. F., O’Reilly, A., et al. |
| Bariatric Surgery versus Intensive Medical Therapy for Diabetes — 3-Year Outcomes | 0.09 | 2014 | 24 | 1547 | Journal Article, Study | Schayer P.R., Bhatt D.L., Kirwan J.P., et al. |
| De novo hiatal hernia of the gastric tube after sleeve gastrectomy | 0.08 | 2015 | 5 | 19 | Journal Article | Amor I.B., Debs T., Kassir R., et al. |
| A safer and simpler technique of duodenal dissection and transection of the duodenal bulb for duodenal switch | 0.07 | 2016 | 6 | 21 | Journal Article, Case Report | Surve A., Zaveri H., Cottam D. |
| Bariatric Surgery and Long-term Cardiovascular Events | 0.07 | 2012 | 40 | 1446 | Journal Article | Sjöström L., Peltonen M,, Jacobson P., et al. |
| Bariatric surgery versus non-surgical treatment for obesity: a systematic review and meta-analysis of randomised controlled trials | 0.06 | 2013 | 58 | 1099 | Review, Metanalysis, Journal Article | Gloy V. L., Briel M., Bhatt D.L, et al. |
| Surgery for weight loss in adults | 0.05 | 2014 | 127 | 1337 | Review, Metanalysis, Journal Article | Colquitt J.L., Pickett K., Loveman, E., et al. |
